# Supplementary material for: Terpenes from Zingiber montanum and Their Screening against Multi-Drug Resistant and Methicillin Resistant Staphylococcus aureus
Source: MDPI journal article supplement (doi:10.3390/molecules24030385), 2019-01-22
Supplement: s1 [file s1]

## **Supplementary material**

### **Terpenes from *Zingiber montanum* and Their Screening against Multi-Drug resistant and Methicillin resistant *Staphylococcus aureus***

**Holly Siddique, Barbara Pendry, and M. Mukhlesur Rahman\***

School of Health, Sports and Bioscience, University of East London, Stratford Campus, Water Lane, London E15 4LZ, UK

\* Correspondence: email: m.rahman@uel.ac.uk; Tel.: +44-2082234299

## Contents

|                                                                                                    |           |
|----------------------------------------------------------------------------------------------------|-----------|
| 1. $^1\text{H}$ and $^{13}\text{C}$ NMR assignments of compounds <b>1</b>                          | p S3-S3   |
| 2. $^1\text{H}$ , $^{13}\text{C}$ , COSY, HSQC and HMBC NMR spectra of compound <b>1</b>           | p S4-S9   |
| 3. HRMS spectrum of compound <b>1</b>                                                              | p S10-S10 |
| 4. $^1\text{H}$ and $^{13}\text{C}$ NMR assignments of compounds <b>2</b>                          | p S11-S11 |
| 5. $^1\text{H}$ , $^{13}\text{C}$ , COSY, HSQC and HMBC NMR spectra of compound <b>2</b>           | p S12-17  |
| 6. HRMS spectrum of compound <b>2</b>                                                              | p S18-S18 |
| 7. Photographic image of antibacterial activity (MICs in mg/L) of compounds 1-3 and<br>norfloxacin | p S19-19  |

1.06 (m, 1H, H-1a), 1.68 (m, , 1H, H-1b), 1.50 (m, 1H, H-2a), 1.57 (m, 1H, H-2b), 1.18 (m, 1H, H-3a), 1.41 (m, 1H, H-3b), 1.13 (m, 1H, H-5), 1.34 (m, 1H, H-6a), 1.75 (m, 1H, H-6b), 2.02 (m, 1H, H-7a), 2.42 (m, 1H, H-7b), 1.90 (m, H-9), 2.31 (m, 1H, H-11a), 2.49 (m, 1H, H-11b), 6.76 (t,  $J=6.6$  Hz, 1H, H-12), 3.41 (d,  $J=16.8$  Hz, 1H, H-14a), 3.46 (d,  $J=16.7$  Hz, 1H, H-14b), 9.63 (t,  $J=14.4$  Hz, 1H, H-15), 9.40 (s, 1H, H-16), 4.36 (s, 1H, H-17a), 4.86 (s, 1H, H-17b), 0.89 (s, 3H, H-18), 0.82 (s, 3H, H-19) and 0.72 (s, 3H, H-20).

S3

# <sup>1</sup>H NMR spectra of compound 1:

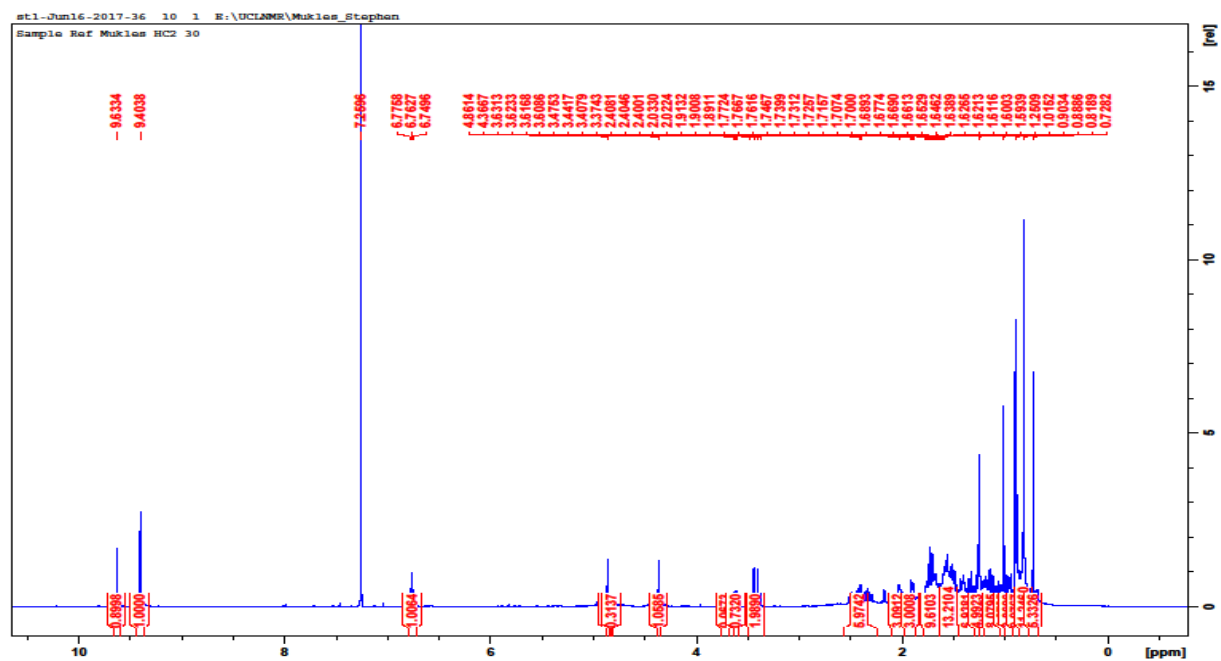

# <sup>1</sup>H NMR spectra (expanded) of compound 1:

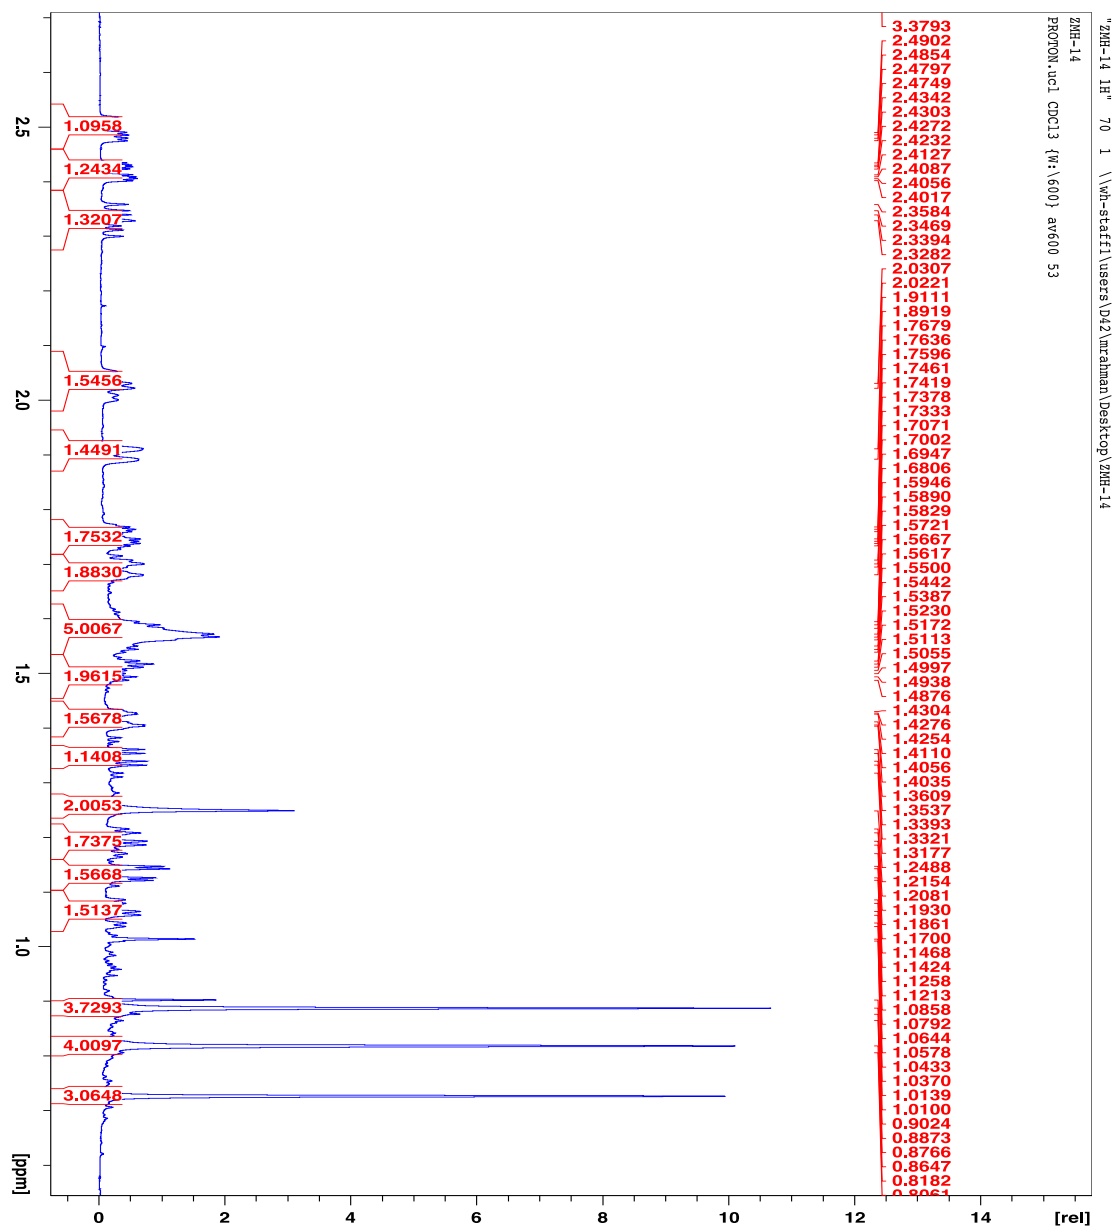

# <sup>1</sup>H NMR spectra (expanded) of compound 1:

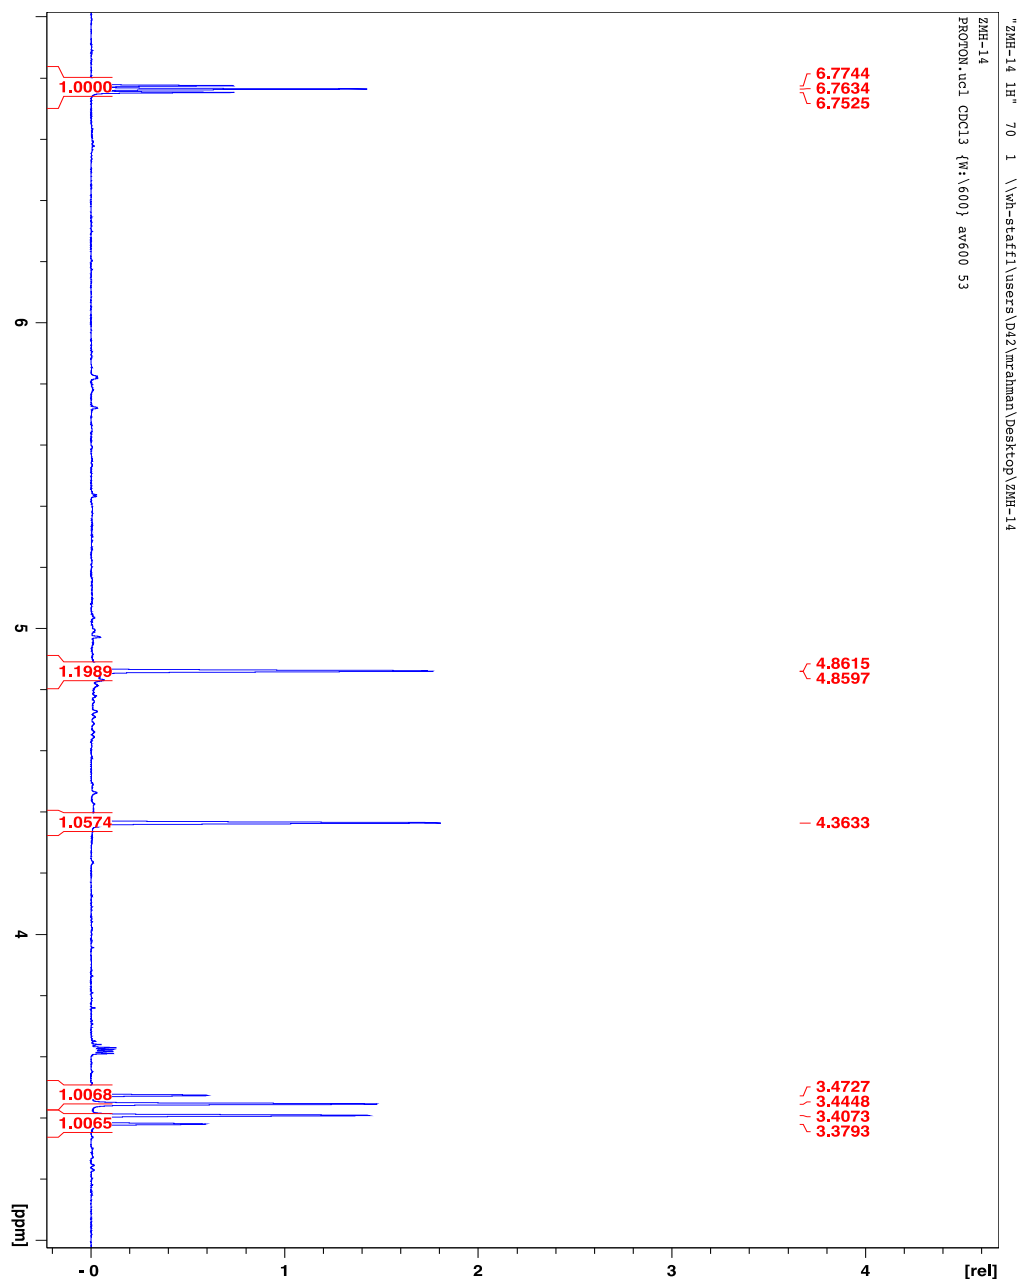

# <sup>13</sup>C NMR spectra of compound 1:

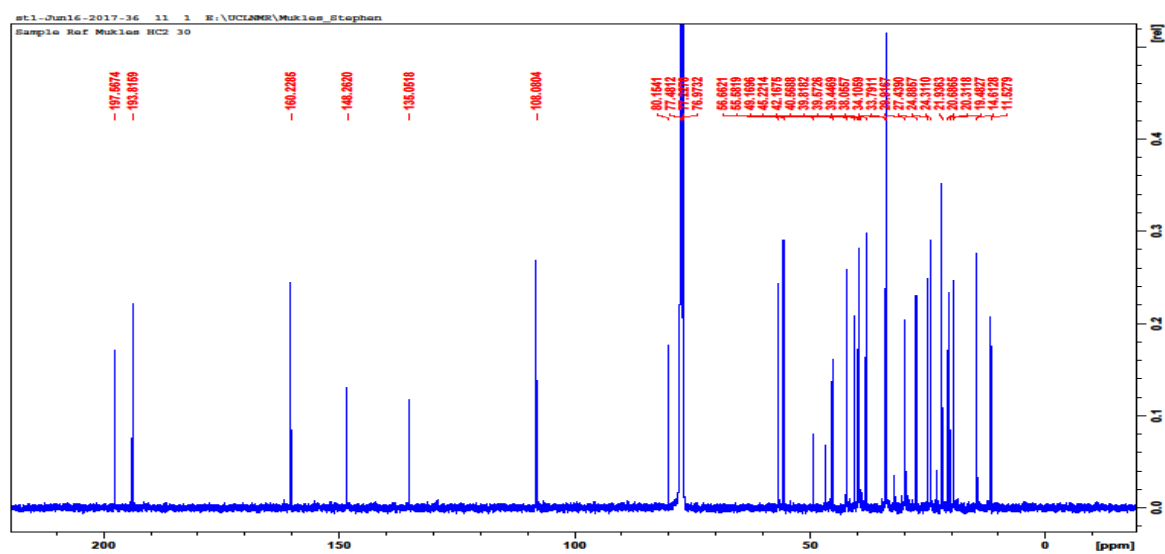

## HSQC NMR spectra of compound 1:

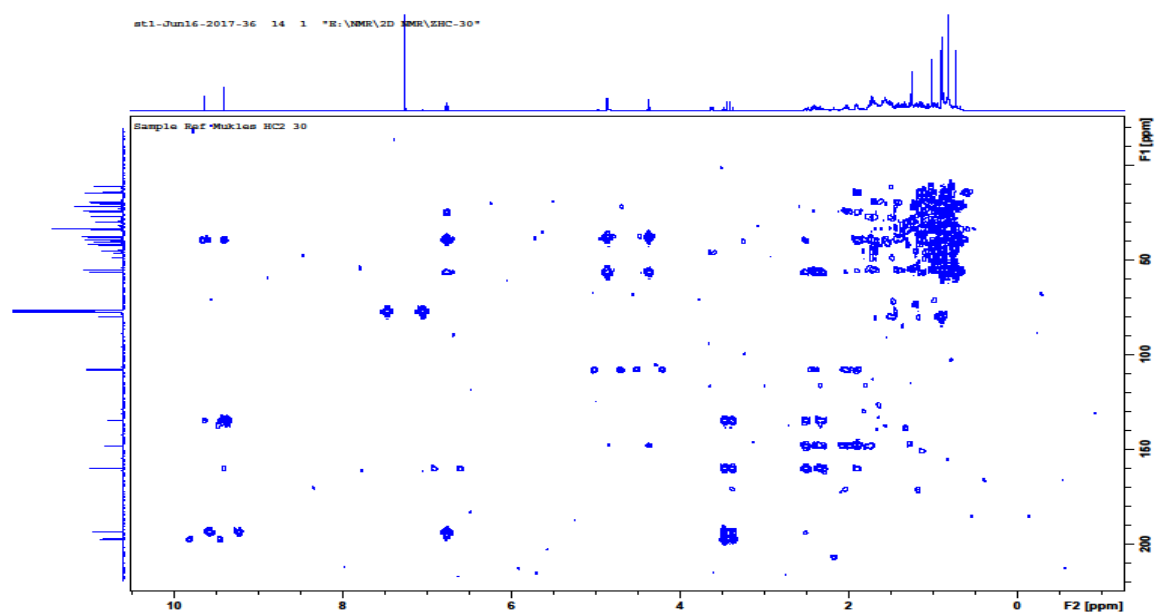

## HMBC NMR spectra of compound 1:

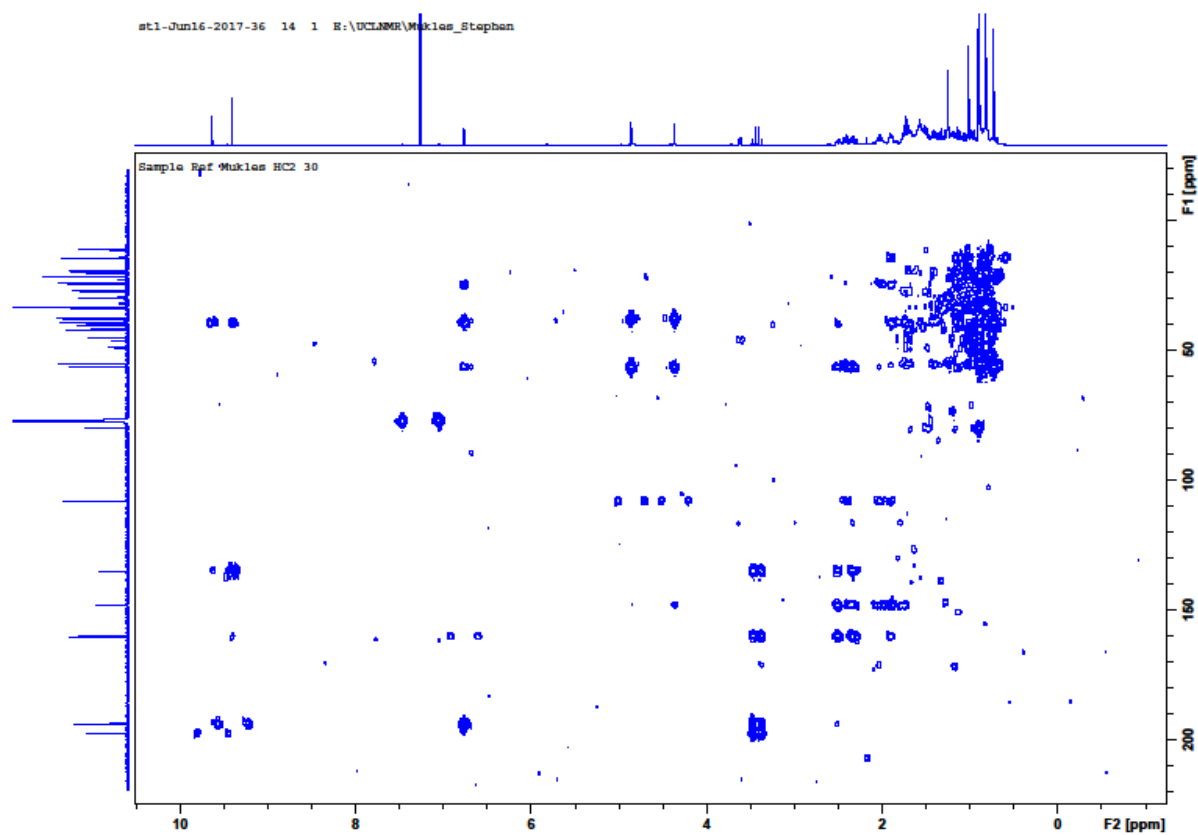

### HRMS (High Resolution Mass Spectroscopy) of compound 1:

The high resolution of mass spectroscopy showed the  $[M+H]^+$  at  $m/z$  303.23122 (calculated for  $C_{20}H_{31}O_2$ , at 303.224580) corresponding to the molecular formula of 1 as  $C_{20}H_{30}O_2$ .

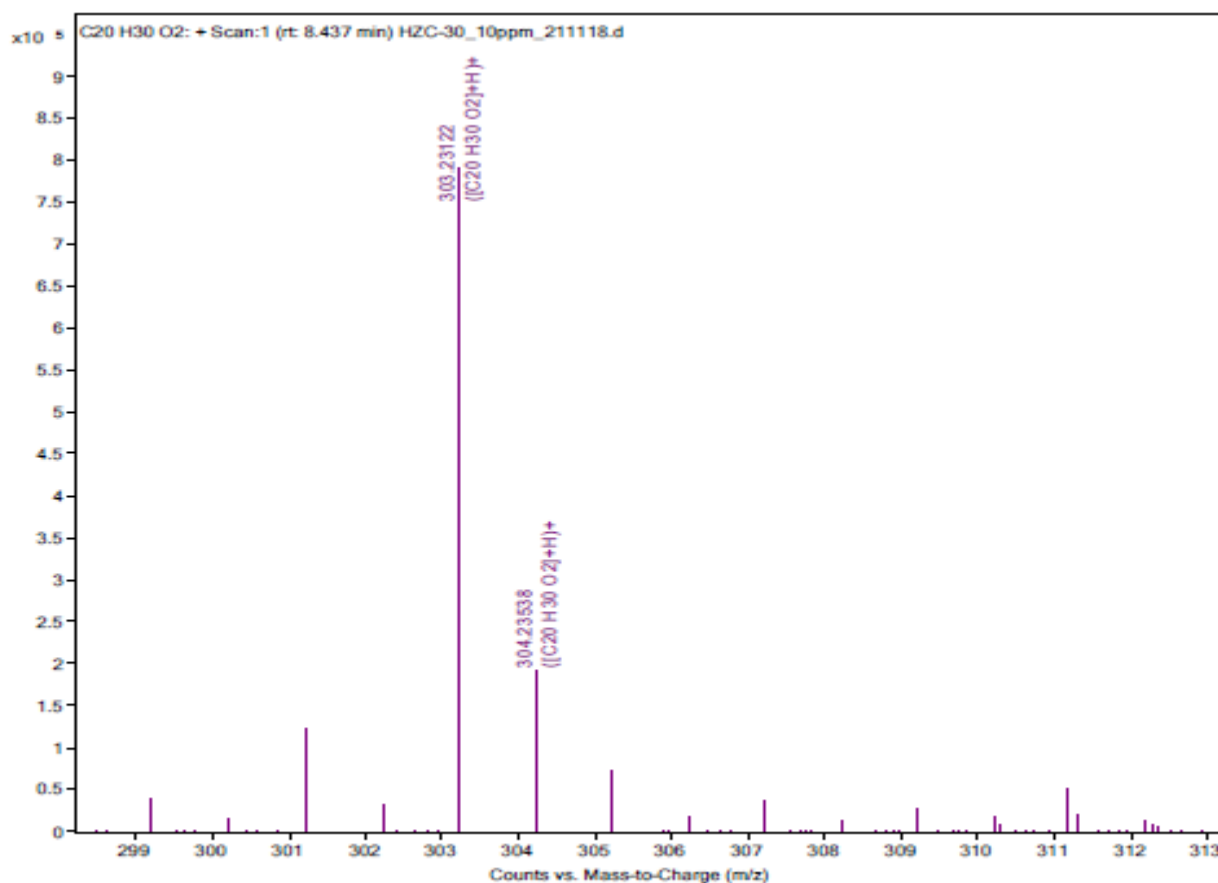

**$^1\text{H}$  and  $^{13}\text{C}$  NMR spectra of compound 2:**

4.63 (d,  $J = 7.5$  Hz, 1H, H-1), 5.20 (d,  $J = 7.5$  Hz, 1H, H-3), 2.20 (m, 1H, H-4a), 2.24 (m, 1H, H-4b); 2.35 (m, 2H, H-5), 4.82, dd,  $J = 10.2, 4.4$  Hz, 1H, H-7), 1.87 (m, 1H, H-8a), 2.32 (m, 1H, H-8b); 5.23 (d,  $J = 16.2$  Hz, 1H, H-10), 5.56 (dd,  $J = 16.2, 7.5$  Hz, 1H, H-11), 1.65 (s, 3H, H-12), 1.43 (s, 3H, H-13), 1.04 (s, 3H, H-14) and 1.06 (s, 3H, H-15).

78.8 (C-1), 142.2 (C-2), 124.8 (C-3), 24.4 (C-4), 39.5 (C-5), 133.2 (C-6), 125.0 (C-7), 42.4 (C-8), 37.3 (C-9), 139.5 (C-10), 131.2 (C-11), 12.8 (C-12), 15.3 (C-13), 24.9 (C-14) and 29.9 (C-15).

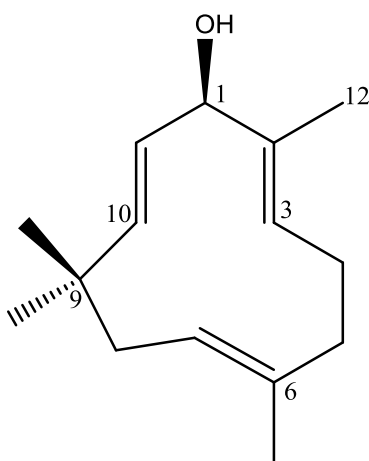

**Compound 2**

# <sup>1</sup>H NMR spectra of compound 2

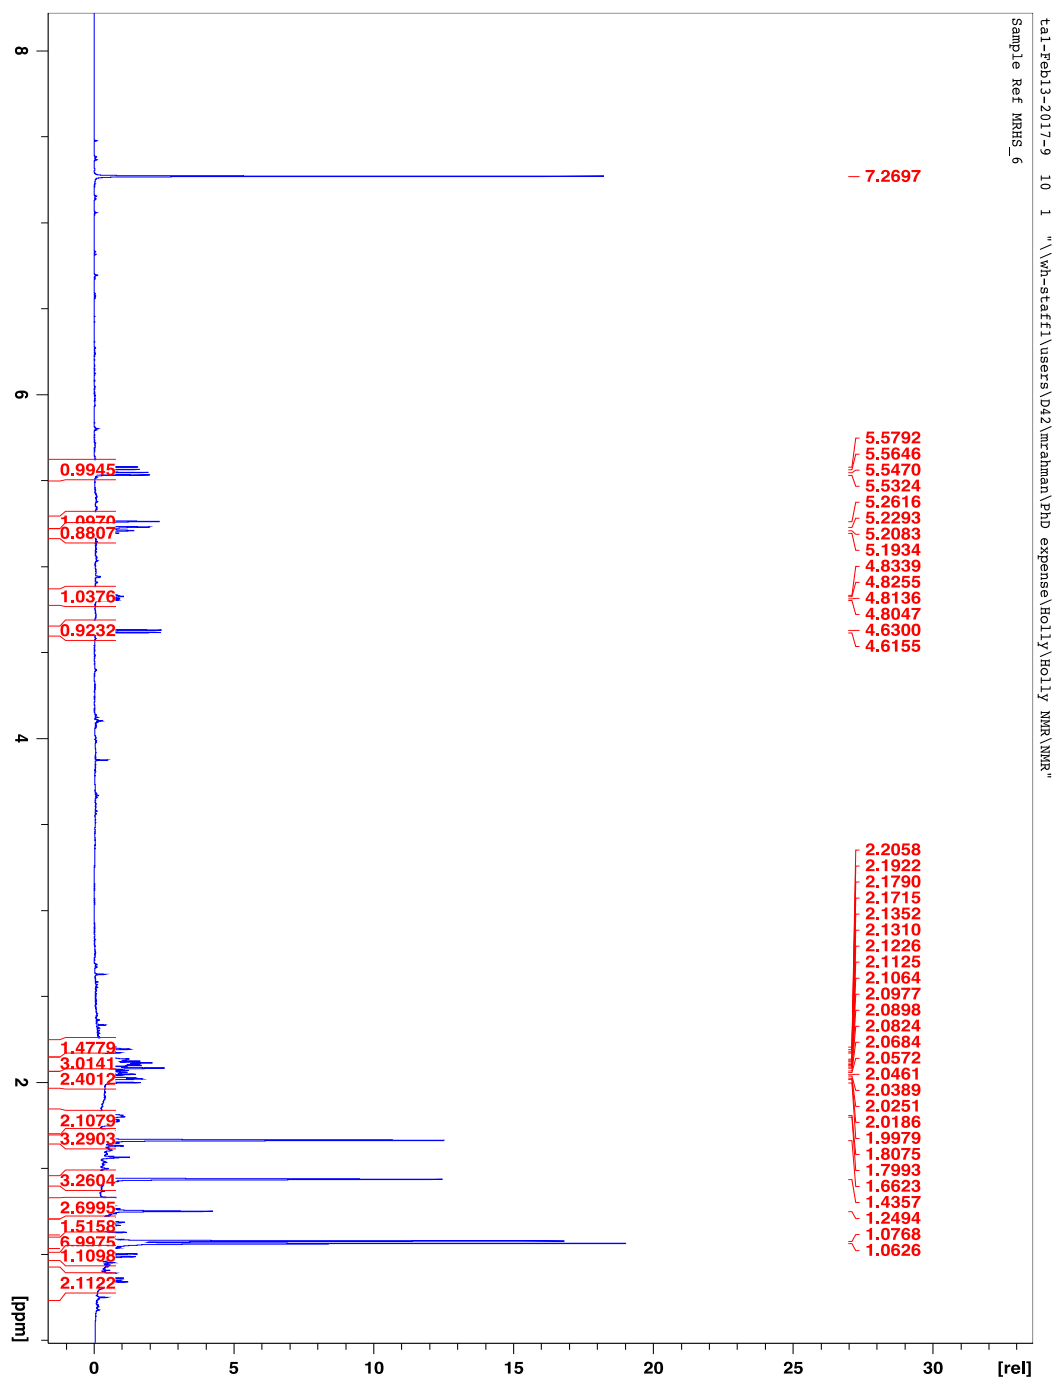

# <sup>1</sup>H NMR spectra (expanded) of compound 2

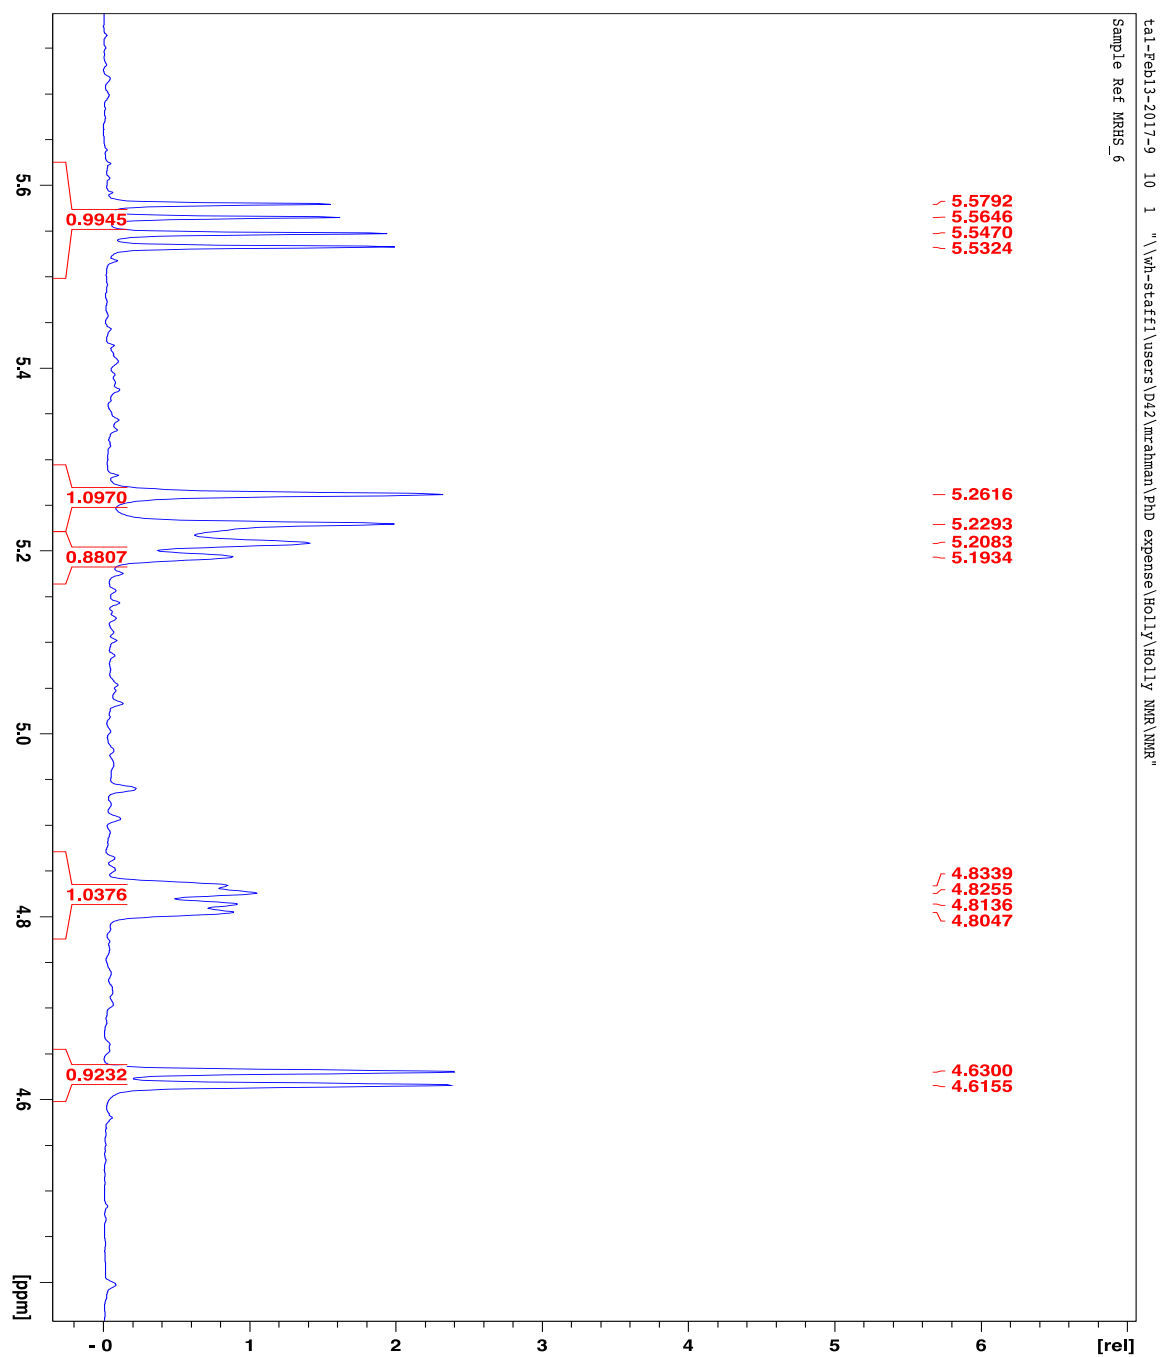

# <sup>13</sup>C NMR spectra of compound 2

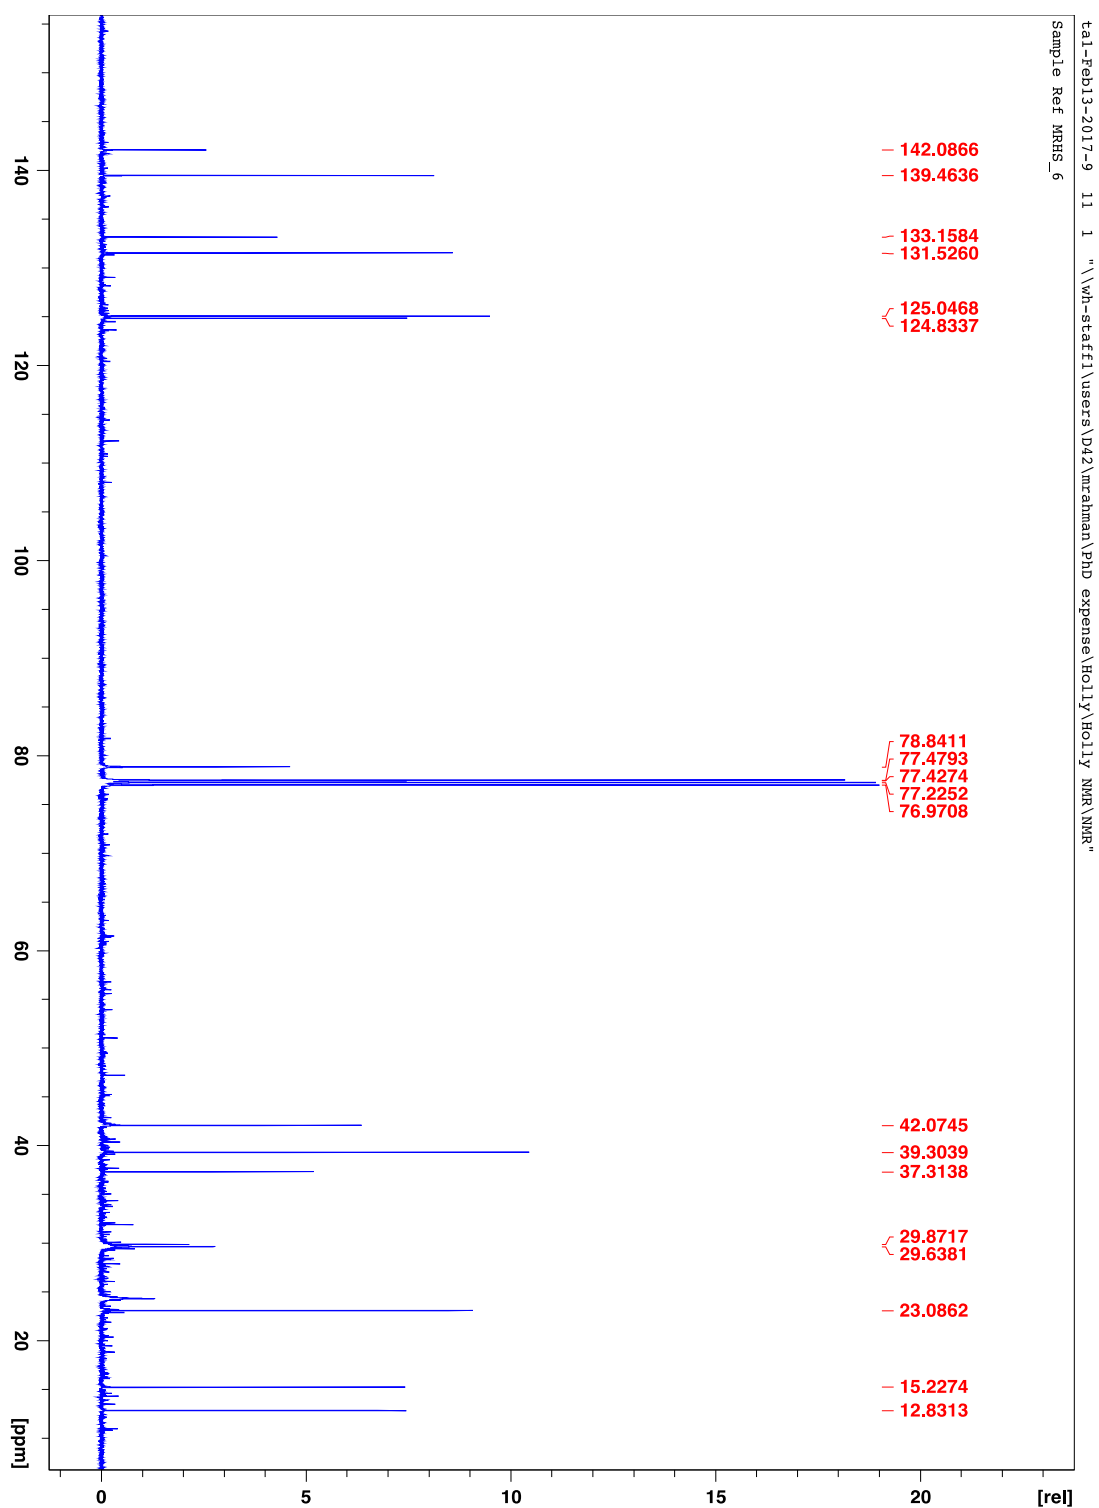

**COSY of compound 2:**

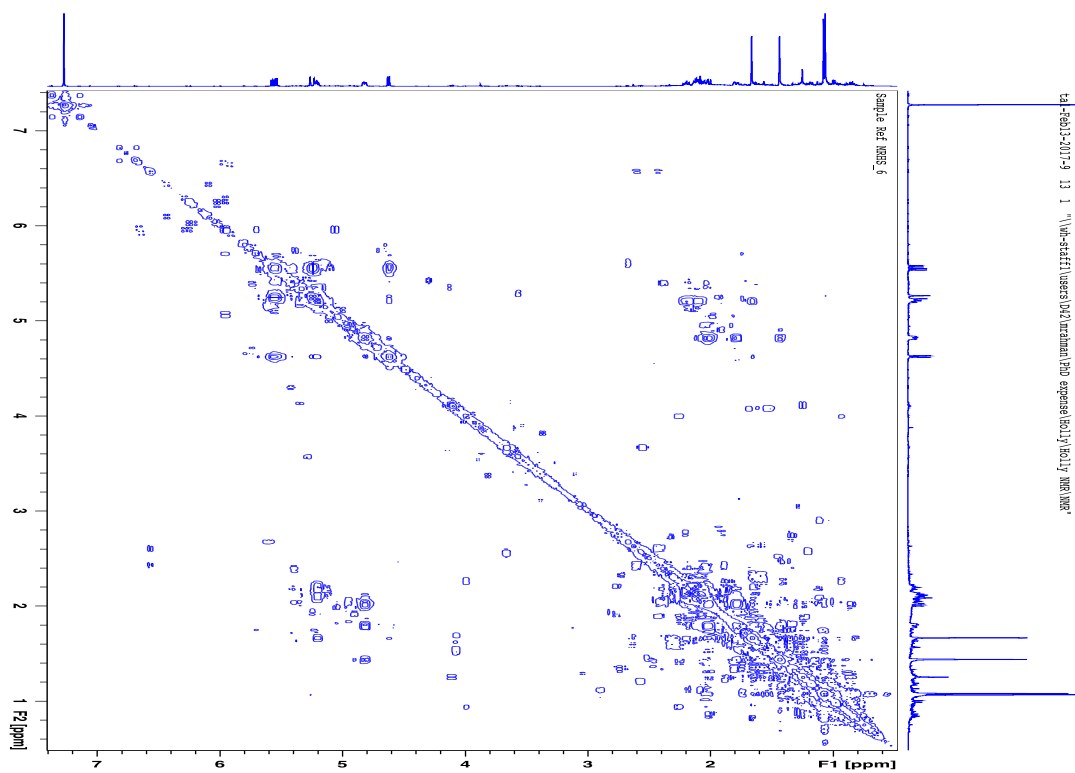

## HSQC of compound 2:

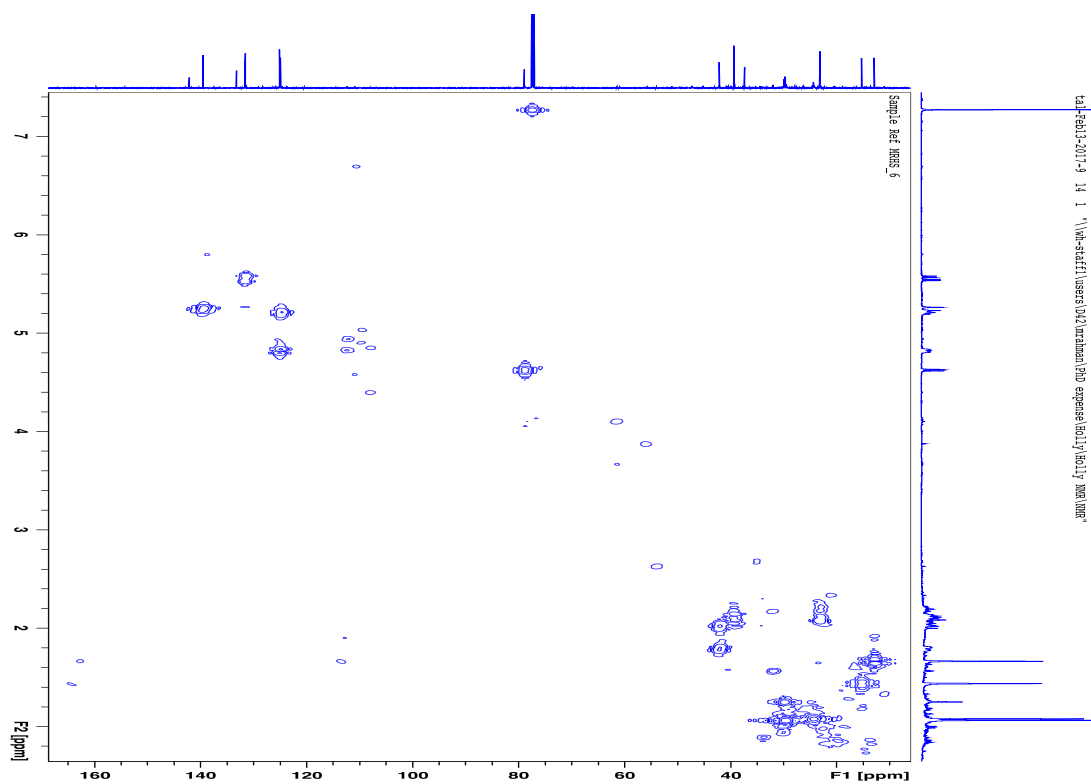

## HMBC of compound 2:

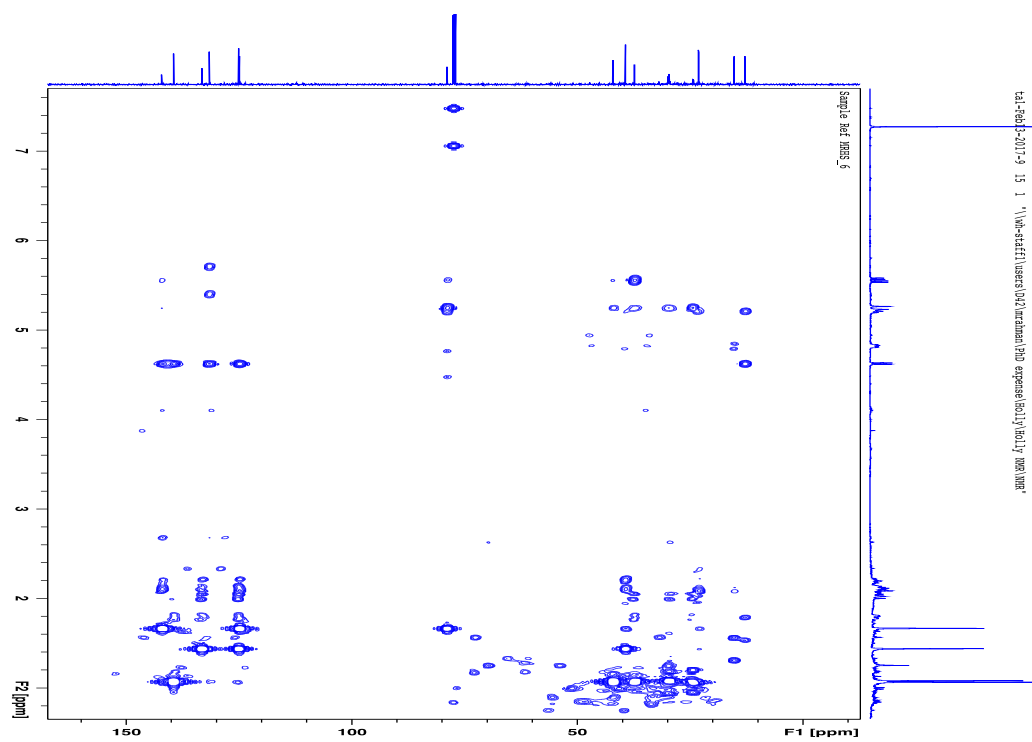

### HRMS (High Resolution Mass Spectrometry) of compound 2:

The high resolution of mass spectroscopy showed the  $[M+H]^+$  at  $m/z$  221.18956 (calculated for  $C_{15}H_{25}O$ , at 221.19054) corresponding to the molecular formula of 2 as  $C_{15}H_{24}O$ .

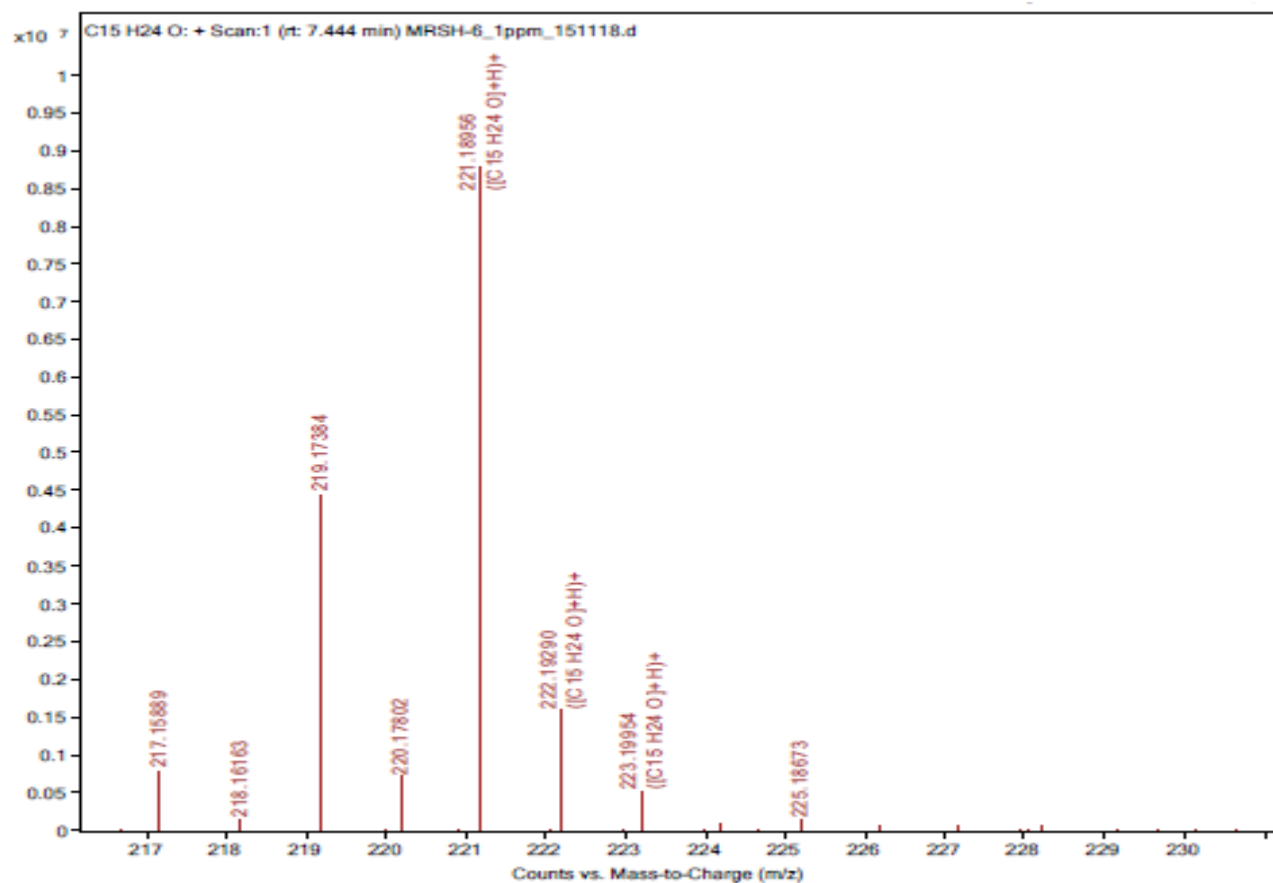

Figure S1: Antibacterial screening of compounds 1-3 and norfloxacin against MRSA strains:

(1= Compound 1; 2= Compound 2; 3=compound 3 and Nor= Norfloxacin)

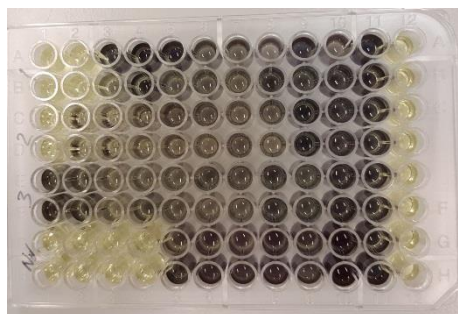

MICs against ATCC 25923

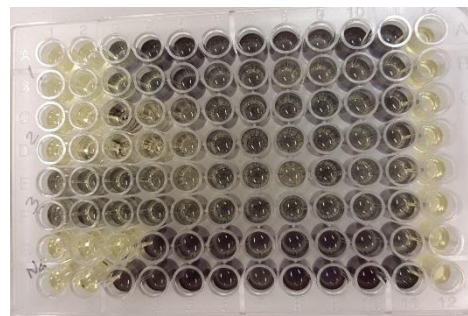

MICs against SA1199B

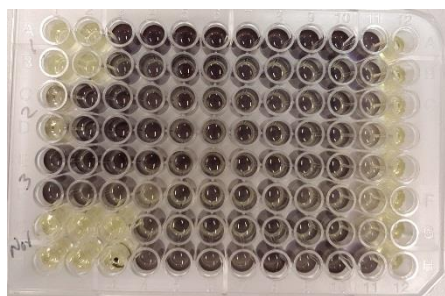

MICs against EMRSA 15

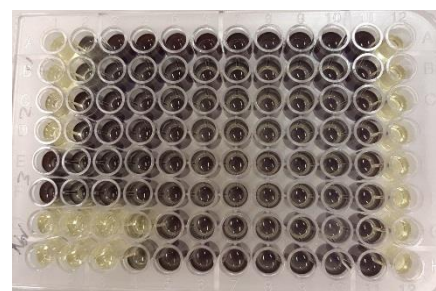

MICs against MRSA 274829

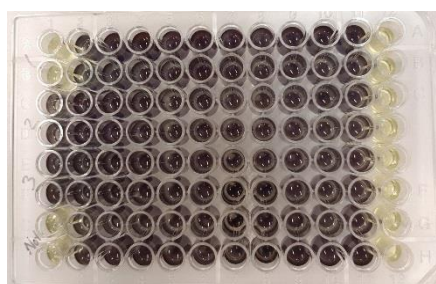

MICs against MRSA 340702

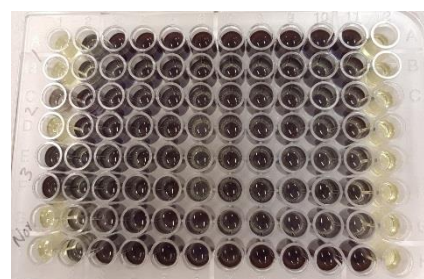

MICs against XU212
